# Supplementary material for: MSC Senescence-Related Genes Are Associated with Myeloma Prognosis and Lipid Metabolism-Mediated Resistance to Proteasome Inhibitors
Source: Hindawi journal article supplement (doi:10.1155/2022/4705654), 2022-11-23
Supplement: f1 [file 4705654.f1.pdf]

A

**GSE83503 Validation Survival rate chi-squared test**

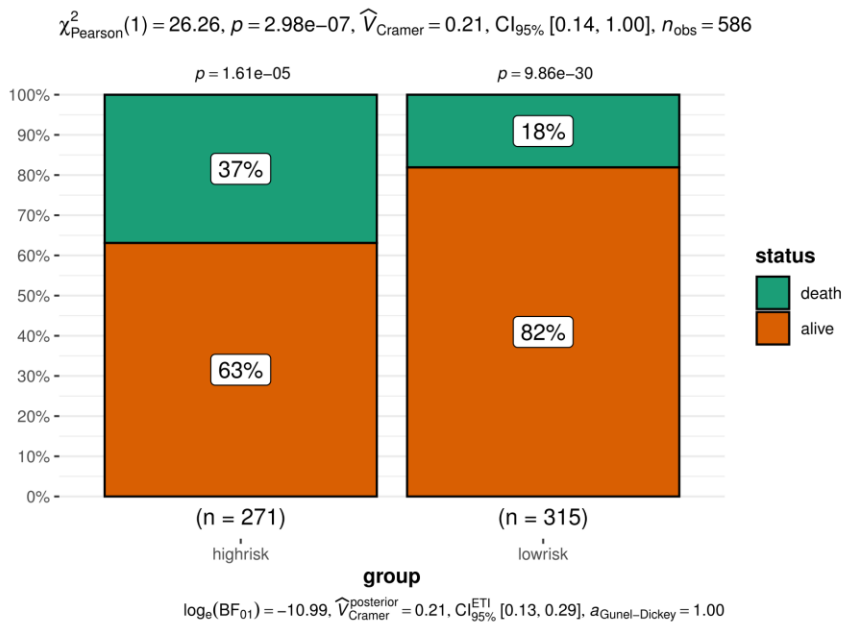

B

**GSE4581 Validation KM**

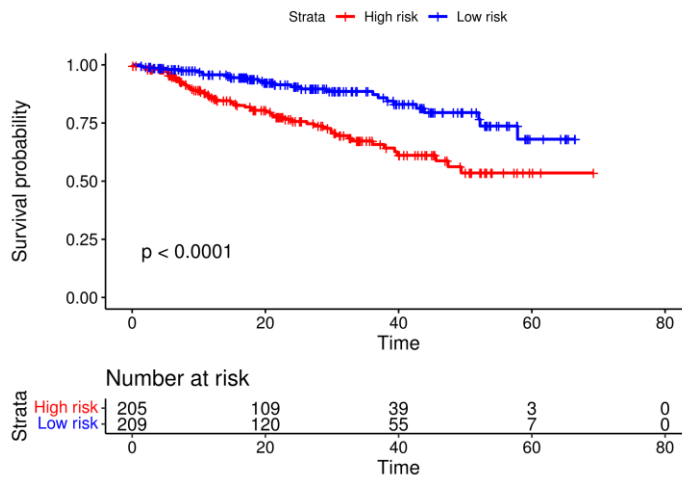

Figure S1. Survival analysis of records from GEO accession numbers GSE83503 and GSE4581 grouped by risk model. (A) A chi-square test was used to calculate the survival rate of the high- and low-risk groups in validation set (GSE83503), and the results showed that the mortality rate was significantly higher in the high-risk group than in the low-risk group ( $P < 0.05$ ). (B) The validation set (GSE4581) Kaplan–Meier curve.
